# Supplementary material for: Exploring the Link between Germline and Somatic Genetic Alterations in Breast Carcinogenesis
Source: PLoS One. 2010 Nov 22;5(11):e14078. doi: 10.1371/journal.pone.0014078 (PMC2989917; doi:10.1371/journal.pone.0014078)
Supplement: Table S3 — (0.03 MB XLS) [file pone.0014078.s003.xls]

## Sheet: Association results
Table S3. Selected loci and SNPs, CGEMS GWAS results, and association results in the Polish study
SNP-Gene					CGEMS (breast cancer risk in postmenopausal women)						Polish case-control (adjusted by age)				Polish case-control (≤ 40 years of first age at diagnosis)										Polish case-control (by ERα tumor status)
																									ERα positive			ERα negative					ERα positive			ERα negative
SNP	Chromosome	Position (bp)	Gene		GWAS rank	OR heterozygote	OR homozygote	P2df*	Ptrend**		OR	95% CI	Ptrend		OR	95% CI	Pdominant	OR	95% CI	Precessive	OR	95% CI	Ptrend		OR	95% CI	Ptrend	OR	95% CI	Ptrend	Pinteraction		OR	95% CI	Precessive	OR	95% CI	Precessive	Pinteraction
rs1062225	10	49313232	MAPK8		25,227	0.88	1.92	0.046999	0.30753		No HW equilibrium
rs1074078	1	11261054	FRAP1		19,450	0.82	0.76	0.035987	0.009194		0.98	0.86-1.12	0.7954		0.82	0.46-1.45	0.494	1.06	0.40-2.81	0.9128	0.90	0.58-1.39	0.6354		1.01	0.87-1.18	0.8916	0.98	0.80-1.20	0.8568	0.8704		1.18	0.86-1.61	0.3084	1.1	0.72-1.69	0.6443	0.7606
rs1078985	3	30665915	TGFBR2		4,221	0.84	1.34	0.007525	0.007697		1.03	0.89-1.18	0.7228		1.11	0.63-1.96	0.7222	0.95	0.42-2.16	0.908	0.84	0.70-1.56	0.99		1.06	0.91-1.24	0.4491	1.03	0.84-1.27	0.7869	0.7011		1.08	0.75-1.55	0.6811	1.25	0.80-1.95	0.3366	0.5782
rs10878640	12	66323355	DYRK2		4,815	1.05	0.68	0.008717	0.0069894		1.01	0.89-1.16	0.8523		2.39	1.32-4.30	0.003484	1.05	0.42-2.64	0.9171	1.67	1.06-2.64	0.024		1.01	0.87-1.17	0.9208	1.08	0.89-1.32	0.4344	0.5182		0.95	0.70-1.29	0.7572	1.11	0.75-1.64	0.588	0.3972
rs11097457	4	96433991	BMPR1B		88	0.73	0.63	0.000187	0.007376		1	0.88-1.14	0.9897		1.93	1.04-3.60	0.03754	0.93	0.45-1.92	0.8431	1.31	0.86-2.00	0.2027		0.94	0.81-1.08	0.3694	1.04	0.86-1.26	0.6535	0.245		0.91	0.70-1.18	0.4787	0.95	0.68-1.32	0.7422	0.8217
rs12404339	1	74550047	TNNI3K		261	1.4	1.33	0.00052	0.0133		1.03	0.89-1.18	0.6906		0.80	0.44-1.44	0.4577	1.11	0.42-2.96	0.8355	0.90	0.58-1.40	0.6443		1.05	0.9-1.23	0.5034	1.01	0.83-1.25	0.8967	0.7411		1.2	0.86-1.67	0.2941	1.39	0.92-2.12	0.118	0.4229
rs12765929	10	88672535	BMPR1A		413	1.37	0.90	0.000762	0.8656		0.99	0.85-1.15	0.856		0.81	0.46-1.43	0.462	5.24	0.64-42.75	0.0613	1.00	0.61-1.62	0.9851		1.02	0.86-1.21	0.818	0.79	0.62-1.00	0.0505	0.0236		0.91	0.58-1.43	0.6758	0.48	0.22-1.03	0.0581	0.0502
rs1350799	15	86358314	NTRK3		3,449	1.22	0.46	0.006037	0.00093		0.93	0.76-1.13	0.4568		1.67	0.77-3.61	0.185	1.14	0.10-12.82	0.9147	1.53	0.76-3.08	0.2217		0.88	0.7-1.09	0.2423	1.02	0.76-1.35	0.9183	0.326		0.69	0.31-1.51	0.354	1.61	0.72-3.60	0.2457	0.0655
rs17720826	17	24085398	TRAF4/RAB34/NEK8/LOC116238		477	0.64	NA	0.000854	0.001047		1.04	0.80-1.34	0.7828		1.07	0.46-2.47	0.8767	NA	NA	0.3838	0.96	0.44-2.11	0.4904		1.14	0.86-1.51	0.3619	0.92	0.62-1.37	0.6863	0.2686		1.82	0.48-6.96	0.3821	0.84	0.09-7.76	0.8776	0.4814
rs1864754	17	54043788	TEX14		148	0.98	0.43	0.000292	0.99831		No HW equilibrium
rs1957895	14	60978085	PRKCH		2,048	1.48	1.09	0.003621	3.678e-05		0.8	0.65-0.98	0.03151		1.02	0.53-1.97	0.9587	0.30	0.03-3.42	0.3172	0.94	0.52-1.70	0.8312		0.79	0.63-1.01	0.0587	0.72	0.52-1.00	0.0507	0.5035		0.56	0.20-1.63	0.2904	NA	NA	0.8192	0.0694
rs2684790	15	97309063	IGF1R		4,118	0.92	0.36	0.007322	0.00187		Calling threshold
rs3732568	3	135998034	EPHB1		11,357	0.75	0.73	0.020853	0.0293		0.79	0.63-0.98	0.03031		0.58	0.28-1.17	0.1282	NA	NA	0.38	0.56	0.28-1.10	0.1126		0.71	0.55-0.91	0.0074	0.80	0.58-1.11	0.181	0.5632		0.76	0.27-2.13	0.608	0.57	0.12-2.65	0.4705	0.5962
rs4707795	6	94111589	EPHA7		26,719	1.21	0.72	0.049765	0.34376		1.07	0.89-1.28	0.47162		1.71	0.83-3.52	0.1344	0.61	0.08-4.46	0.6318	1.45	0.77-2.73	0.2408		1.06	0.86-1.29	0.6004	1.08	0.82-1.40	0.5928	0.9835		2.15	1.06-4.37	0.0336	0.43	0.10-1.96	0.2775	0.0069
rs6852678	4	76899928	CDKL2		25,193	1.07	0.73	0.046948	0.001047		0.96	0.83-1.11	0.60753		1.00	0.57-1.78	0.9917	0.32	0.10-1.00	0.04365	0.82	0.52-1.30	0.4039		0.92	0.79-1.09	0.334	1.02	0.83-1.26	0.8393	0.2995		0.75	0.51-1.09	0.133	0.79	0.48-1.30	0.3496	0.6877
rs7192816	16	23921025	PRKCB1		3,095	0.85	0.66	0.005434	0.0642		1.02	0.90-1.17	0.7276		0.73	0.40-1.34	0.3058	0.60	0.28-1.30	0.1998	0.74	0.49-1.13	0.1636		1.04	0.89-1.21	0.6134	1.04	0.85-1.27	0.7062	0.9568		0.89	0.66-1.19	0.4198	0.97	0.66-1.42	0.8756	0.5856
rs7669364	4	5406231	STK32B		746	1.22	8.15	0.001308	0.07626		Calling threshold
rs855821	1	64073384	ROR1		3,347	1.4	NA	0.005869	0.6573		0.86	0.65-1.14	0.2905		NA	NA	NA	NA	NA	NA	2.32	0.74-7.33	NA		0.95	0.7-1.28	0.7244	0.68	0.43-1.07	0.0974	0.1445		0.31	0.04-2.70	0.2884	NA	NA	0.8086	0.4815
rs9836340	3	89488444	EPHA3		2,554	0.97	0.62	0.004497	0.000791		1	0.88-1.15	0.9506		0.71	0.40-1.26	0.246	0.76	0.33-1.78	0.5344	0.79	0.53-1.19	0.2637		0.92	0.79-1.07	0.2872	1.08	0.88-1.31	0.4702	0.1186		0.88	0.61-1.26	0.4774	1.53	1.02-2.31	0.0402	0.0101
rs9893560	17	62190050	PRKCA		844	0.67	0.93	0.001499	0.004165		1.05	0.82-1.34	0.7108		0.66	0.31-1.41	0.2813	0.62	0.04-10.02	0.7361	0.68	0.34-1.37	0.2859		0.97	0.73-1.28	0.8037	1.22	0.86-1.72	0.2692	0.2293		0.43	0.08-2.22	0.3139	2.21	0.63-7.79	0.217	0.0378
*Score test with two degrees of freedom (df); analyses adjusted for age, matching factors and eigenvectors as originally described (Hunter et al., 2007)
**Calculated using raw data after approval of a Data Access Request
